# Supplementary material for: Fabrication of a core-shell structure from boron nitride nanosheets and ammonium polyphosphate (BN@APP) for reducing the fire hazards in waterborne polyurethane
Source: Research Square preprint supplement (doi:10.21203/rs.3.rs-8354403/v1), 2026-01-06
Supplement: Supplementary file 1 [file f5953fd68ab76105df4264f9.docx]

**Supporting Information**

**Fabrication of a core-shell structure from boron nitride nanosheets and ammonium polyphosphate (BN@APP) for reducing the fire hazards in waterborne polyurethane**

Deyu Liu1, Xuan Ba1, Shaoyuan Wu1, Jinghan Hu1, Jihong Duan1, Xingyu Guan1,Guoyong Zhou2, Kui Wang1, Weijiang Huang1, Wei Yan1*

1. School of Materials Science and Engineering, Guiyang University, Guiyang 550005, PR China
2. School of Chemical Engineering, Guizhou Minzu University, Guiyang 550025, PR China

Correspondence: [lrasyw@163.com](mailto:lrasyw@163.com)

**
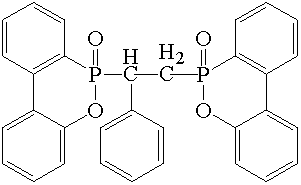
**

**Fig.S1.** DIDOPO structural formula.

**Table S1** TGA and DTG results before and after modification of BN@APP.

| Samples | T5%(℃) | Tmax-1(℃) | Tmax-2(℃) | Tmax-3(℃) | CharResidueat700℃  (wt.%) |
| --- | --- | --- | --- | --- | --- |
| APP | 292.3 | 318.9 | 356.5 | 546.2 | 46.64 |
| BN | 221.2 | —— | —— | —— | 99.99 |
| BN@APP | 307.3 | 327.1 | —— | —— | 51.46 |

**
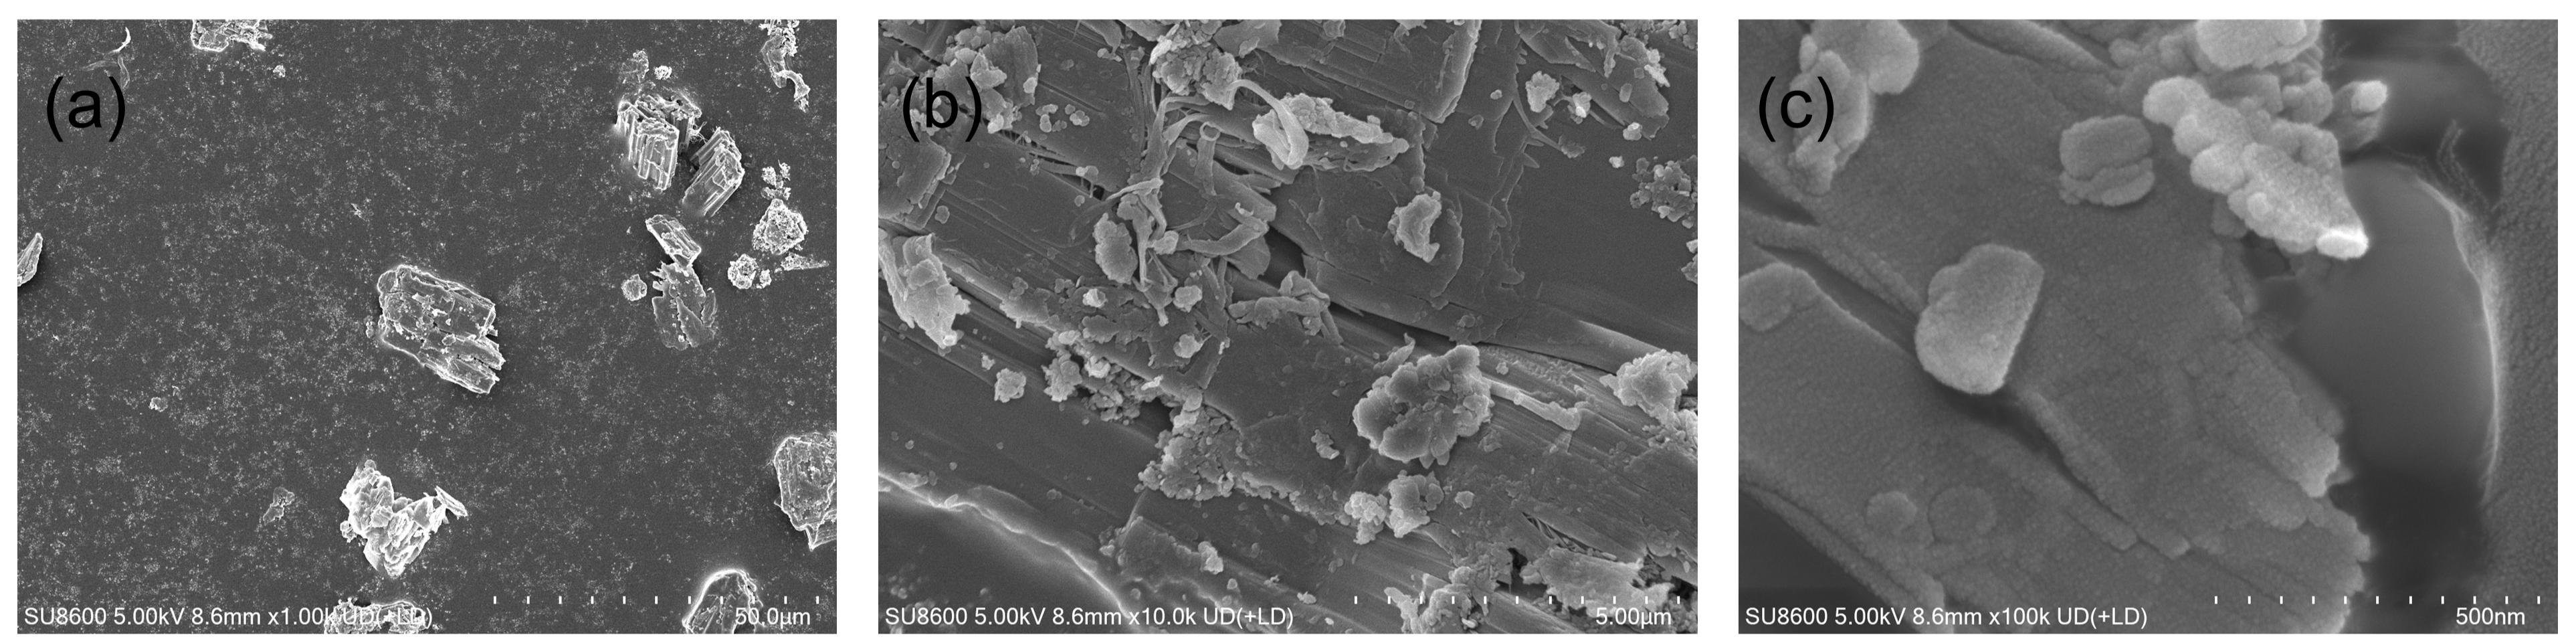
**

**Fig.S2.** SEM image of the BN@APP：(a) overview, with (b) and (c) showing magnified views of the selected areas, respectively.

**
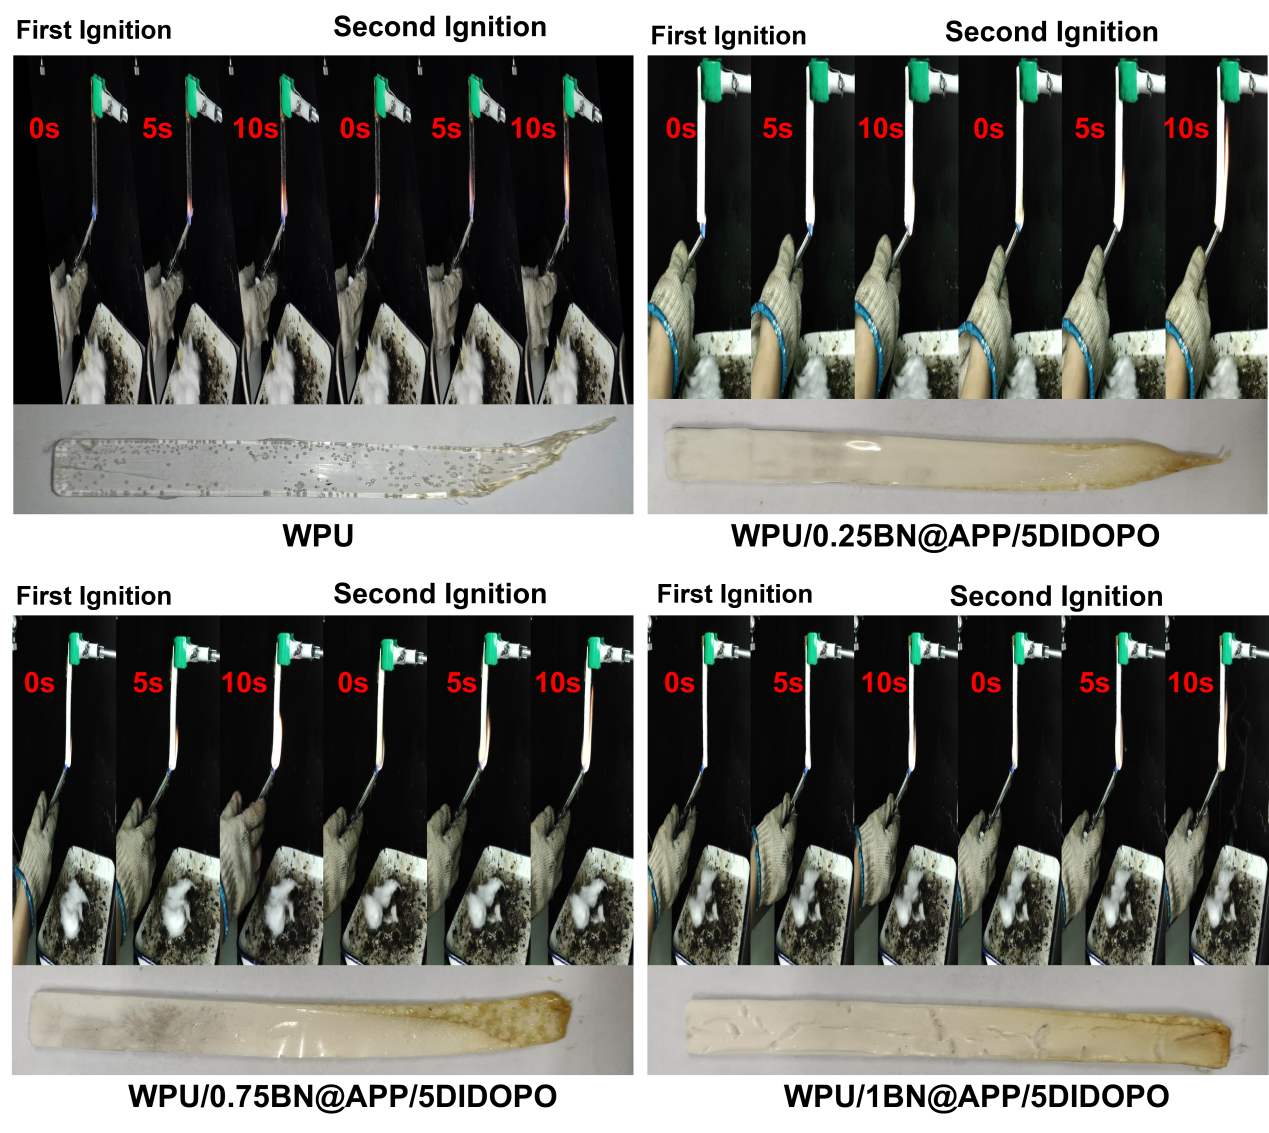
**

**Fig.S3.** Digital photographs of WPU and its composites from the UL-94 test.

**Table S2** Mechanical propersties of WPU and its Composites

| Sample | Breaking Stress(MPa) | Breaking Strain(%) | Elastic Modulus(GPa) |
| --- | --- | --- | --- |
| WPU | 8.07±0.2 | 5.15±0.08 | 1.57±0.02 |
| WPU/0.25BN@APP/5DIDOPO | 17.94±0.4 | 4.95±0.35 | 3.62±0.08 |
| WPU/0.5BN@APP/5DIDOPO | 13.96±1.1 | 5.24±0.92 | 2.66±0.09 |
| WPU/0.75BN@APP/5DIDOPO | 9.31±0.7 | 5.77±0.65 | 1.61±0.07 |
| WPU/1BN@APP/5DIDOPO | 5.97±0.3 | 4.45±0.24 | 1.34±0.01 |
